# Supplementary material for: Farnesylated heat shock protein 40 is a component of membrane-bound RISC in Arabidopsis
Source: PubMed Central journal article supplement (PMC6204899; doi:10.1074/jbc.ra118.003887), 2018-09-07
Supplement: supp_RA118.003887_138017_1_supp_168974_p6n662.pdf [file supp_RA118.003887_138017_1_supp_168974_p6n662.pdf]

## **SUPPORTING INFORMATION FOR THE MANUSCRIPT ENTITLED**

Farnesylated Heat Shock Protein 40 is a component of membrane-bound RISC in Arabidopsis

**BY**

Lars Sjögren, Maïna Floris, Andrea Barghetti, Franziska Völlmy, Rune Linding and Peter Brodersen

## **LIST OF MATERIAL INCLUDED**

Figures S1-S7

Tables S1-S3

Excel files containing the full list of protein groups identified by mass spectrometry analysis of AGO1 and mock immuno-affinity purifications of solubilized membrane fractions from formaldehyde-crosslinked seedling tissue.

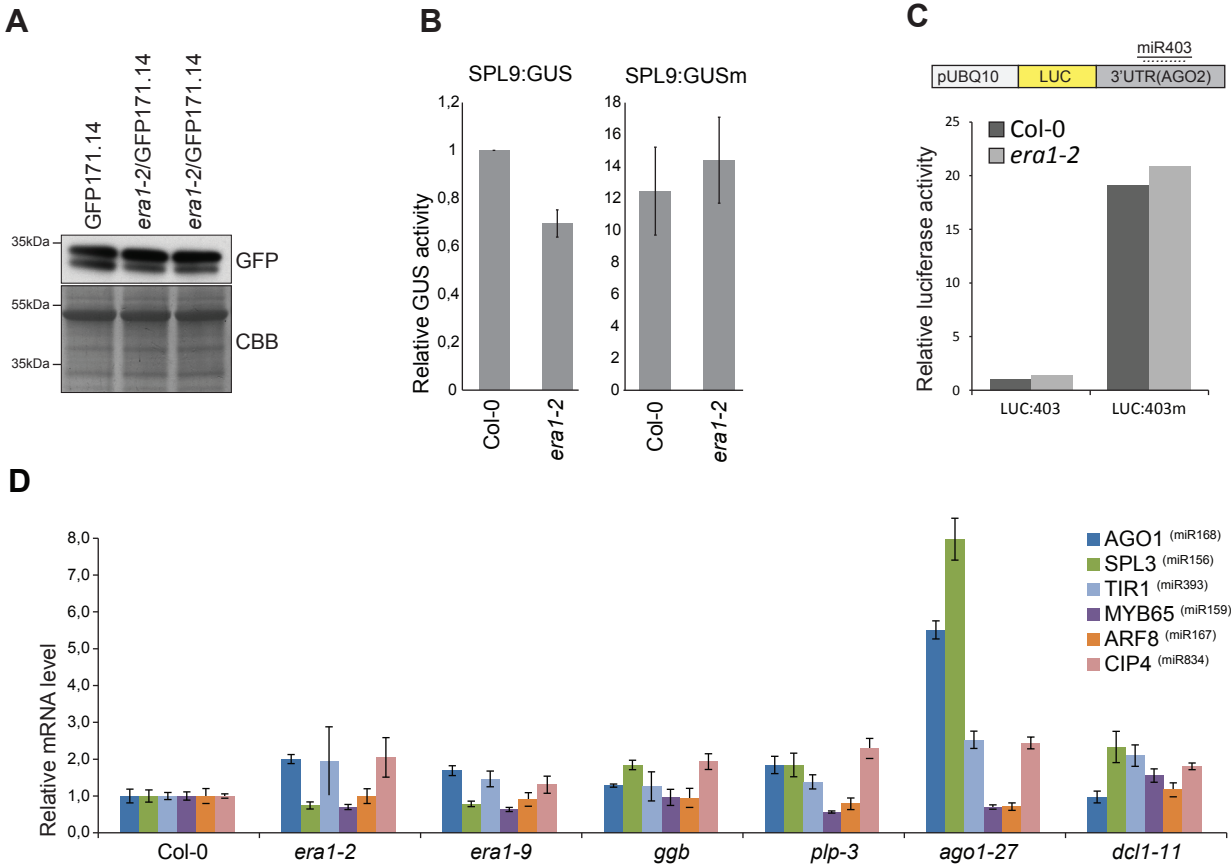

**Figure S1 Defects in miRNA-guided silencing are not detectable in *era1* and *plp* single mutants**

- (A) *era1* mutation does not cause derepression of the stable, transgenic GFP171.14 silencing system that uses a constitutively expressed *GFP* transgene containing a miR171 target site in the 3'-UTR immediately downstream of the stop codon (1,2). Total protein fractions in 16-day old seedlings were analyzed by western blot and were developed with a GFP antibody.
- (B) *era1* mutation does not cause derepression of the stable transgenic SPL9:GUS silencing system that uses a translational fusion of the natural miR156 target, SPL9 to GUS (3). The panel shows relative GUS activity in total protein extracts of Col-0 and *era1-2* 10-day-old seedlings expressing the SPL9:GUS fusion reporter (SPL9:GUS) or its control in which the miR156 target site is mutated (SPL9:GUSm). Error bars represent standard deviation between duplicates.
- (C) Relative luciferase activity in total lysates of Col-0 and *era1-2* 16-day old seedlings expressing a miR403 luciferase reporter construct (LUC:403), or its control in which the miR403 target site is mutated (LUC:403m). The luciferase coding sequence is followed by the AGO2 3'UTR carrying the miR403 target site, and expressed under the control of the ubiquitin10 promoter, as shown in the schematic representation of the construct.
- (D) Quantitative RT-PCR analysis of mRNA abundance of miRNA targets in 16-day old seedlings. Error bars represent standard deviation between triplicates.

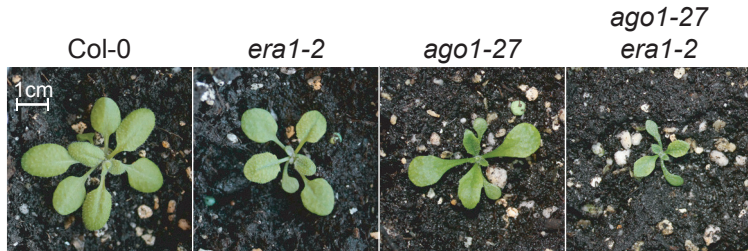

**Figure S2 Genetic interaction between *ago1-27* and *era1-2***

Phenotypes of 22-day old plants of Col-0 wildtype and *era1-2*, *ago1-27*, and *era1-2/ago1-27* mutants.

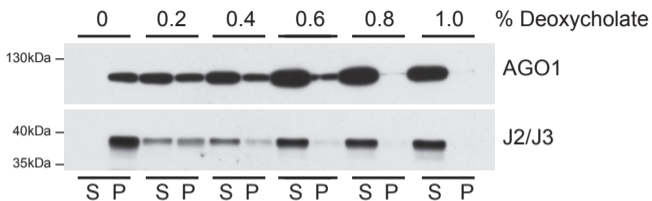

### Figure S3 AGO1 protein extraction from deoxycholate-solubilized microsomes

Test of efficiency of solubilization of AGO1 and J2/J3 from microsomes by increasing concentrations of deoxycholate. Microsome pellets were resuspended in hypertonic lysis buffer containing the indicated concentrations of deoxycholate, and insoluble material was pelleted by centrifugation at 100.000xg for 30 minutes. S, supernatant, P, pellet.

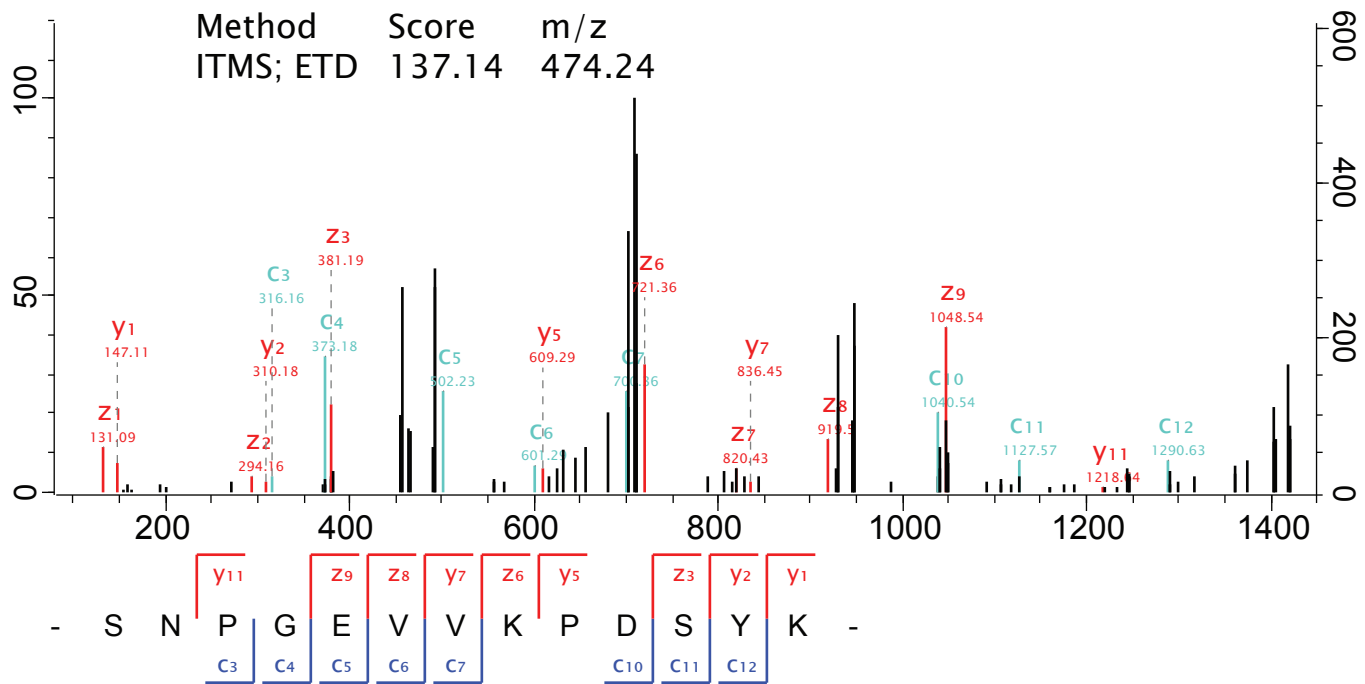

**Figure S4 Identification of J3 in AGO1 immuno-purified from microsome fractions**

Fusion Orbitrap MS/MS mass spectrum of the tryptic peptide of J3: SNPGEVVKPDSYK. Electron transmission-dissociation fragmentation resulted in high c-, z- and y- ion coverage of the peptide, identified with an Andromeda score of 137.14. The sample was prepared by immune-purification of AGO1 from deoxycholate-solubilized microsomes prepared from formaldehyde-crosslinked seedling tissue.

**A**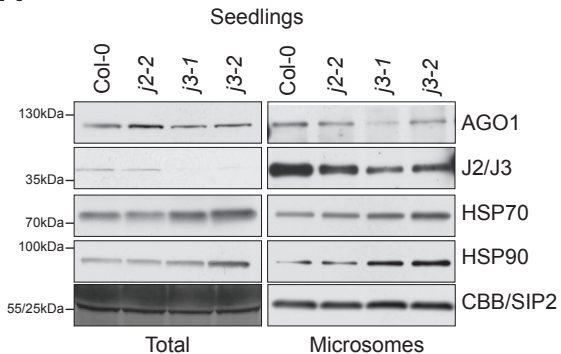**B**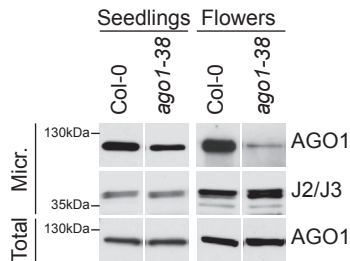**C**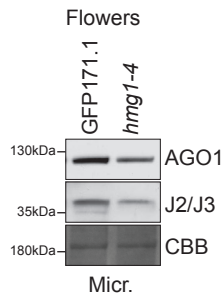

### Figure S5 Effects of *j2*, *j3*, *ago1-38* and *hmg1-4* single mutations on membrane association of AGO1

(A-C) Western blot of AGO1, J2/J3, HSP70, and HSP90 in total and microsomes fractions prepared from lysates of the indicated genotypes. For total fractions, equal loading was verified by Coomassie staining (CBB); for microsomes fractions, western blots were probed with SIP2 antibodies. In panel A, the loading controls panels come from different sections of the full membranes: the leftmost molecular weight marker corresponds to the membrane with total lysates, the rightmost molecular weight marker corresponds to the membrane with microsomes fractions.

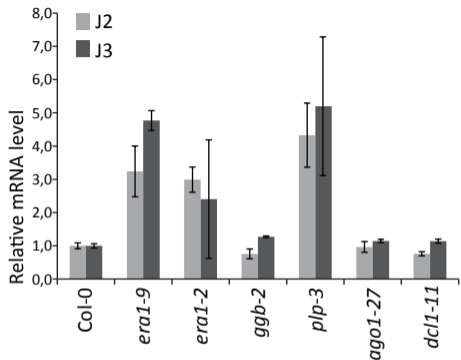

**Figure S6 J2 and J3 mRNA is induced in FTase mutants**

Total RNA from 16-day old seedlings was subjected to oligo(dT)-primed reverse transcription, and J2 and J3 mRNAs were quantified by real-time PCR using actin as a normalization control. Error bars indicate standard deviations among technical triplicates.

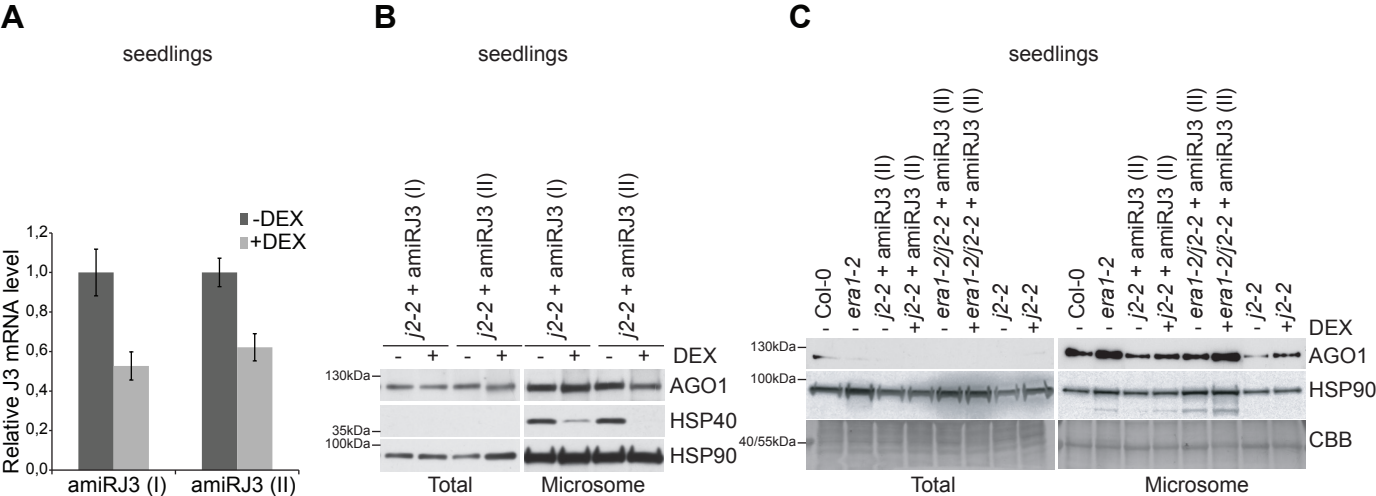

### Figure S7 Analysis of AGO1 levels in membrane fraction upon J2/J3 knock-down

**(A)** Quantitative RT-PCR analysis of J3 mRNA in Col-0 seedlings expressing the dexamethasone inducible artificial miRNA targeting J3 (amiR-J3). amiR-J3(I) and (II) indicate two independent lines expressing amiR-J3. Error bars represent standard deviation between triplicates.

**(B-C)** Western blot of AGO1, J2/J3, and HSP90 in total and microsome fractions prepared from lysates of 16-day old seedlings of the indicated genotypes grown in the presence of dexamethasone to induce the expression of the artificial miRNA. Proteins were extracted from equal amount of plant tissue, and the same volume was loaded on the gel was each sample. Coomassie Brilliant Blue (CBB), was used to stain the membranes in C. These loading controls panels come from different sections of the full membranes: the leftmost molecular weight marker corresponds to the membrane with total lysates, the rightmost molecular weight marker corresponds to the membrane with microsome fractions.



| Oligonucleotide # | Oligonucleotide name | Sequence 5'-3'                     | Use                            |
|-------------------|----------------------|------------------------------------|--------------------------------|
| 1                 | RP-era1-C-Fw         | CCTAGGAGATTACATCTTGAG              | Genotype era1-9                |
| 2                 | LP-era1-C-Rv         | CAATTTGTTTCGTCTACCTTG              | Genotype era1-9                |
| 3                 | LB1*                 | GCCTTTTCAGAAATGGATAAATAGCCTTGCTTCC | Genotype era1-9                |
| 4                 | era1-06-fw           | AAGTCTGGACCCATTATGCTA              | Genotype era1-2                |
| 5                 | era1-08-rv           | CATCATCATCACTGTCTTCAA              | Genotype era1-2                |
| 6                 | plp-C09-Fw           | AAACGAGAGCTCATGGCGATA              | Genotype plp-3                 |
| 7                 | plp-C09-Rv           | CTGCCACTGTAATCTTGCTCT              | Genotype plp-3                 |
| 8                 | GABI_O8760-Rv*       | GGGCTACACTGAAITGGTAGCTC            | Genotype plp-3                 |
| 9                 | LP2-J2-d2-Fw         | GAAGAGGACCTTCAAGGAAGA              | Genotype j2-2                  |
| 10                | RP2-J2-d2-Rv         | TCATAAGCCTGTGCTAACTCT              | Genotype j2-2                  |
| 11                | J3-2-TDNA-Fw         | ATATACCAGAGGCCATTCATG              | Genotype j3-2                  |
| 12                | J3-UTR-TDNA-Rv       | TCATATAAATTAATAAAATTGCG            | Genotype j3-2                  |
| 13                | LBb1.3*              | ATTTTGCCGATTTCCGGAAC               | Genotype j2-2 and j3-2         |
| 14                | SAQQ-PfeI-Fw         | GGTGGTGCTCAAAGGGTGAAT              | Genotype J3C417S               |
| 15                | SAQQ-PfeI-Rv         | GCAAGAGACAAATTGGTTGGAGC            | Genotype J3C417S               |
| 16                | miR156 probe         | GTGCTCACTCTCTTCTGTCA               | Northern hybridization         |
| 17                | miR159 probe         | TAGAGTCCCTTCAATCCAAA               | Northern hybridization         |
| 18                | miR160 probe         | TGGCATACAGGGAGCCAGGCA              | Northern hybridization         |
| 19                | miR167 probe         | TAGATCATGCTGGCAGCTTCA              | Northern hybridization         |
| 20                | miR166 probe         | GGGGAATGAAGCCTGGTCCGA              | Northern hybridization         |
| 21                | miR398 probe         | CAGGGTGACCTGAGAACA                 | Northern hybridization         |
| 22                | miR403 probe         | AATTAGATTCAAGCACAAAACA             | Northern hybridization         |
| 23                | U6 probe             | AGGGGCCATGCTAATCTTCTC              | Northern hybridization         |
| 24                | PHB_FWD_qPCR         | AGAGTTCCCTTCCAAGGCTACAG            | PHB qPCR                       |
| 25                | PHB_REV_qPCR         | ATAGCGACTATGCCAATAGAATCC           | PHB qPCR                       |
| 26                | REV_qPCR_Fw1         | TAC ACA GCT GAG CAA GTC GA         | REV qPCR                       |
| 27                | REV_qPCR_Rv1         | GTT GTC GAC GGA GAG AGC TA         | REV qPCR                       |
| 28                | MYB65_FWD_qPCR       | GATGGTTCCTGATAGCCATACAGTTAC        | MYB65 qPCR                     |
| 29                | MYB65_REV_qPCR       | TAGGCATCAACAGAGTCAAGGAGATC         | MYB65 qPCR                     |
| 30                | YUC5_qPCR_Fw         | TTC CAG AGA TCG ATG GGC TC         | YUC5 qPCR                      |
| 31                | YUC5_qPCR_Rv         | TCC ACA TCC GAC GAC AAG AA         | YUC5 qPCR                      |
| 32                | IAA20_qPCR_Fw1       | TGT CTC TTA ATG GCT ACC GCG ACT    | IAA20 qPCR                     |
| 33                | IAA20_qPCR_Rv1       | TCA GCC CAG AGA ATG GAT GCG T      | IAA20 qPCR                     |
| 34                | IAA30_qPCR_Fw1       | TTC AAT GCT TCA ATC CTT TGG        | IAA30 qPCR                     |
| 35                | IAA30_qPCR_Rv1       | AGC ACG TGA CTC TTC TCA CTA CA     | IAA30 qPCR                     |
| 36                | CP1 qt F             | CAAGGAACTTGCGGAAGTTGT              | CP1 qPCR                       |
| 37                | CP1 qt R             | CGTAGTCCATTAACCAGCCG               | CP1 qPCR                       |
| 38                | TAA1_qPCR_Fw         | TGG AGA ACT CGA GGA AAC CC         | TAA1 qPCR                      |
| 39                | TAA1_qPCR_Rv         | CAC CTG TCA CCC ATC TTC CT         | TAA1 qPCR                      |
| 40                | AGO1_FWD_qPCR        | AAGGAGTTCGAGGAGGGTATGG             | AGO1 qPCR                      |
| 41                | AGO1_REV_qPCR        | CAAATTGCTGAGCCAGAACAGTAGG          | AGO1 qPCR                      |
| 42                | SPL3_FWD_qPCR        | CAAGTAGTAGTGAGTTTGTGACGGTCCG       | SPL3 qPCR                      |
| 43                | SPL3_REV_qPCR        | TTTCCGCTTCTCTCGTTGTGTC             | SPL3 qPCR                      |
| 44                | TIR1_FWD_qPCR        | GCCTCTCTCTATCTGGCCTCTT             | TIR1 qPCR                      |
| 45                | TIR1_REV_qPCR        | AGGCGAGCTCTCTGGTCTCGA              | TIR1 qPCR                      |
| 46                | ARF8_FWD_qPCR        | AGATGTTTGCTATCGAAGGGTTGTTG         | ARF8 qPCR                      |
| 47                | ARF8_REV_qPCR        | CCATGGGTCATCACCAAGGAGAAG           | ARF8 qPCR                      |
| 48                | CIP4_FWD_qPCR        | CAGTGAGTTGACATCTACTCCAGTTAC        | CIP4 qPCR                      |
| 49                | CIP4_REV_qPCR        | CGTTCACAATTTCTCTTGAAGC             | CIP4 qPCR                      |
| 50                | CSD2_FWD_qPCR        | TTTCATCTCCATGAGTTTGGTG             | CSD2 qPCR                      |
| 51                | CSD2_REV_qPCR        | AAAGGCTCTTCCAACAACAGA              | CSD2 qPCR                      |
| 52                | AGO2_qPCR_Fw         | TAACTCCTTTTTCTGGTAGA               | AGO2 qPCR                      |
| 53                | AGO2_qPCR_Rv         | ACCAAAAAAAGAAGAAGACGT              | AGO2 qPCR                      |
| 54                | TAS1B_FWD_qPCR       | CCATGTGTCAGTTTCGACCA               | TAS1B qPCR                     |
| 55                | TAS1B_REV_qPCR       | GGTGAATGGTTAGATACCGATGA            | TAS1B qPCR                     |
| 56                | PHV_FWD_qPCR         | CGTGATGTTAACAACCCAGCTA             | PHV qPCR                       |
| 57                | PHV_REV_qPCR         | CGTGAAACAGCTACGATACCAA             | PHV qPCR                       |
| 58                | SCL6-IV_FWD_qPCR     | TGTCTAGCTCAGGGGATATTGG             | SCL6-IV qPCR                   |
| 59                | SCL6-IV_REV_qPCR     | AGTGCTCTTTCTAATGGCTTC              | SCL6-IV qPCR                   |
| 60                | J3-qPCR-1-Fw         | GAGGCCCTTTGGAGGTA                  | J3 qPCR                        |
| 61                | J3-qPCR-1-Rv         | GGATGAACAACATCCTCACCA              | J3 qPCR                        |
| 62                | J2-qPCR-1-Fw         | GGTAGTGGTGGACCCATTTC               | J2 qPCR                        |
| 63                | J2-qPCR-1-Rv         | GGATGAACAACATCTCACCA               | J2 qPCR                        |
| 64                | J3-qPCR-2-Fw         | TCCTTAGAGAGACTTTGACCCA             | J3 qPCR                        |
| 65                | J3-qPCR-2-Rv         | AACAAGTTTCGATGTTCCACCG             | J3 qPCR                        |
| 66                | J2-qPCR-2-Fw         | CAACATGCGCATCTTAGTGATC             | J2 qPCR                        |
| 67                | J2-qPCR-2-Rv         | GAATTAGGACGAGGTTCTTCC              | J2 qPCR                        |
| 68                | SUL-fwd probe        | ATATCGAAAAGGCTTTGACAGAAG           | Northern hybridization         |
| 69                | SUL-rev probe        | AATCTGGTCTTGAAGCTTGTC              | Northern hybridization         |
| 70                | UBQ10(U)_fwd         | GGCTTAATGTGCTTCTTACATTCTGAGCC      | USER cloning: UL403 and UL403m |
| 71                | UBQ10(U)_FLuc_rev    | GTCTAATCUGTTAATCAGAAAACTCAG        | USER cloning: UL403 and UL403m |
| 72                | FLuc(U)_UBQ10_fwd    | AGATTGGAUCCACCATGGAAGACGCC         | USER cloning: UL403 and UL403m |
| 73                | FLUC(U)_RV           | ACAATTUGGACTTTCCGCCCTTCTT          | USER cloning: UL403 and UL403m |
| 74                | AGO2_3'UTR(U)_FW     | AAATTGUGAAGAAGAGAGTGAGTTT          | USER cloning: UL403 and UL403m |
| 75                | 403mut(U)_RV         | ATCTAAGTUGCACAAACTCTTTCTACCA       | USER cloning: UL403 and UL403m |
| 76                | 403mut(U)_FW         | AACTTAGAUATTTGGGTTTTTCGTAGTG       | USER cloning: UL403 and UL403m |
| 77                | AGO2_3'UTR(U)_RV     | GGTTTAAUACCAAAAAAAGAAGAAGAC        | USER cloning: UL403 and UL403m |

Supplementary Table S1: Oligonucleotides used in this study

**Table S2**

| Accession | Mutant                  | Transgene                  | Insertion       | Reference |
|-----------|-------------------------|----------------------------|-----------------|-----------|
| Col-0     | <i>era1-2</i>           |                            |                 | (4)       |
| Ler       | <i>era1-4</i>           |                            |                 | (5)       |
| Col-0     | <i>era1-9</i>           |                            | SAIL_146D09     | (6,7)     |
| Col-0     | <i>ggb-1</i>            |                            |                 | (8)       |
| Col-0     | <i>plp-3</i>            |                            | GABI-KAT 386C07 | (7,9)     |
| Col-0     | <i>ago1-27</i>          |                            |                 | (10)      |
| Col-0     | <i>ago1-38</i>          |                            |                 | (11)      |
| Col-0     | <i>dcl1-11</i>          |                            |                 | (12)      |
| Col-0     | <i>dcl1-11/era1-2</i>   |                            |                 | This work |
| Col-0     | <i>ago1-27/era1-2</i>   |                            |                 | This work |
| Col-0     | <i>hsp90.2-3</i>        |                            |                 | (13)      |
| Col-0     | <i>hsp90.2-3/era1-2</i> |                            |                 | This work |
| Col-0     |                         | SUC:SUL                    |                 | (14)      |
| Col-0     | <i>era1-2</i>           | SUC:SUL                    |                 | This work |
| Col-0     | <i>plp-3</i>            | SUC:SUL                    | GABI-KAT 386C07 | This work |
| Col-0     | <i>j2-2/j3-2</i>        | SUC:SUL + J3(WT)/J3(C417S) |                 | This work |
| Col-0     | <i>j2-2/j3-2</i>        | SUC:SUL + J3(WT)/J3(C417S) |                 | This work |
| Col-0     |                         | pJ3:2xFLAG-2xHA-J3         |                 | (7)       |
| Col-0     |                         | pJ3:2xFLAG-2xHA-J3(C417S)  |                 | (7)       |
| Col-0     | <i>j3-1</i>             |                            | SALK_132923     | (15)      |
| Col-0     | <i>j3-2</i>             |                            | SALK_141625     | (7,16)    |
| Col-0     | <i>j2-2</i>             |                            | SALK_071563     | (7,16)    |
| Col-0     | <i>j2-2</i>             | pDEX:amiR-J3               |                 | (7)       |
| Col-0     | <i>j2-2/era1-2</i>      | pDEX:amiR-J3               |                 | This work |
| Col-0     | <i>j3-1</i>             | pJ3:J3                     |                 | (7)       |
| Col-0     | <i>j3-1</i>             | pJ3:J3(C417S)              |                 | (7)       |
| Col-0     | <i>j2-2/j3-2</i>        | pJ3:J3                     |                 | (7)       |
| Col-0     | <i>j2-2/j3-2</i>        | pJ3:J3(C417S)              |                 | (7)       |
| Col-0     | <i>j3-1/plp-3</i>       |                            |                 | This work |
| Col-0     |                         | SPL9:GUS/SPL9:GUSm         |                 | (17)      |
| Col-0     | <i>era1-2</i>           | SPL9:GUS/SPL9:GUSm         |                 | This work |
| Col-0     | <i>plp-3</i>            | SPL9:GUS/SPL9:GUSm         | GABI-KAT 386C07 | This work |
| Col-0     |                         | GFP171.14                  |                 | (1)       |
| Col-0     | <i>era1-2</i>           | GFP171.14                  |                 | This work |
| Col-0     |                         | UL403/UL403m               |                 | This work |
| Col-0     | <i>era1-2</i>           | UL403/UL403m               |                 | This work |

**Table S2. Arabidopsis mutants and transgenic lines used in this study.**

**Table S3**

| Antibody       | Organism/type/antigen                        | Reference         |
|----------------|----------------------------------------------|-------------------|
| AGO1 (for IP)  | Rabbit/polyclonal                            | Agrisera AS09 527 |
| AGO1 (western) | Rabbit/polyclonal/peptide                    | This work         |
| ChII (SUL)     | Rabbit/polyclonal/Synechosystis ChII protein | (18), (19)        |
| Hsp40 (J2/J3)  | Rabbit/polyclonal/peptide                    | This work         |
| Hsp70          | Rabbit/polyclonal                            | Agrisera AS08 371 |
| Hsp90-1        | Rabbit/polyclonal                            | Agrisera AS08 346 |
| FLAG           | Mouse/monoclonal/peptide                     | Sigma A8592       |
| SIP2           | Rabbit/polyclonal                            | Agrisera AS09 496 |
| BiP            | Rabbit/polyclonal                            | Agrisera AS09 481 |
| ARF1           | Rabbit/polyclonal                            | Agrisera AS08 325 |
| H+/ATPase      | Rabbit/polyclonal                            | Agrisera AS07 260 |
| V/ATPase       | Rabbit/polyclonal                            | Agrisera AS09 577 |
| VDAC1          | Rabbit/polyclonal                            | Agrisera AS07 212 |
| PEX14          | Rabbit/polyclonal                            | Agrisera AS08 372 |

**Table S3. Antibodies used in this study****References**

1. Moissiard, G., Parizotto, E. A., Himber, C., and Voinnet, O. (2007) Transitivity in Arabidopsis can be primed, requires the redundant action of the antiviral Dicer-like 4 and Dicer-like 2, and is compromised by viral-encoded suppressor proteins. *RNA* **13**, 1268-1278
2. Parizotto, E. A., Dunoyer, P., Rahm, N., Himber, C., and Voinnet, O. (2004) In vivo investigation of the transcription, processing, endonucleolytic activity, and functional relevance of the spatial distribution of a plant miRNA. *Genes & development* **18**, 2237-2242
3. Wu, G., Park, M. Y., Conway, S. R., Wang, J.-W., Weigel, D., and Poethig, R. S. (2009) The Sequential Action of miR156 and miR172 Regulates Developmental Timing in Arabidopsis. *Cell* **138**, 750-759
4. Cutler, S., Ghassemian, M., Bonetta, D., Cooney, S., and McCourt, P. (1996) A protein farnesyl transferase involved in abscisic acid signal transduction in Arabidopsis. *Science* **273**, 1239-1241
5. Ziegelhoffer, E. C., Medrano, L. J., and Meyerowitz, E. M. (2000) Cloning of the Arabidopsis WIGGUM gene identifies a role for farnesylation in meristem development. *Proc Natl Acad Sci USA* **97**, 7633-7638
6. Sessions, A., Burke, E., Presting, G., Aux, G., McElver, J., Patton, D., Dietrich, B., Ho, P., Bacwaden, J., Ko, C., Clarke, J. D., Cotton, D., Bullis, D., Snell, J., Miguel, T., Hutchison, D., Kimmerly, B., Mitzel, T., Katagiri, F., Glazebrook, J., Law, M., and Goff, S. A. (2002) A high-throughput Arabidopsis reverse genetics system. *Plant Cell* **14**, 2985-2994
7. Barghetti, A., Sjogren, L., Floris, M., Paredes, E. B., Wenkel, S., and Brodersen, P. (2017) Heat-shock protein 40 is the key farnesylation target in meristem size control, abscisic acid signaling, and drought resistance. *Genes & Development* **31**, 2282-2295
8. Johnson, C. D., Chary, S. N., Chernoff, E. A., Zeng, Q., Running, M. P., and Crowell, D. N. (2005) Protein geranylgeranyltransferase I is involved in specific aspects of abscisic acid and auxin signaling in Arabidopsis. *Plant Physiol* **139**, 722-733
9. Rosso, M. G., Li, Y., Strizhov, N., Reiss, B., Dekker, K., and Weisshaar, B. (2003) An Arabidopsis thaliana T-DNA mutagenized population (GABI-Kat) for flanking sequence tag-based reverse genetics. *Plant Mol Biol* **53**, 247-259

10. Morel, J.-B., Gordon, C., Mourrain, P., Beclin, C., Boutet, S., Feuerbach, F., Proux, F., and Vaucheret, H. (2002) Fertile hypomorphic *ARGONAUTE (ago1)* mutants impaired in post-transcriptional gene silencing and virus resistance. *Plant Cell* **14**, 629-639
11. Gregory, B. D., O'Malley, R. C., Lister, R., Urich, M. A., Tonti-Filippini, J., Chen, H., Millar, A. H., and Ecker, J. R. (2008) A link between RNA metabolism and silencing affecting Arabidopsis development. *Dev Cell* **14**, 854-866
12. Zhang, J. F., Yuan, L. J., Shao, Y., Du, W., Yan, D. W., and Lu, Y. T. (2008) The disturbance of small RNA pathways enhanced abscisic acid response and multiple stress responses in Arabidopsis. *Plant Cell Environ* **31**, 562-574
13. Hubert, D. A., Tornerio, P., Belkhadir, Y., Krishna, P., Takahashi, A., Shirasu, K., and Dangl, J. L. (2003) Cytosolic HSP90 associates with and modulates the Arabidopsis RPM1 disease resistance protein. *EMBO J* **22**, 5679-5689
14. Himber, C., Dunoyer, P., Moissiard, G., Ritzenthaler, C., and Voinnet, O. (2003) Transitivity-dependent and -independent cell-to-cell movement of RNA silencing. *EMBO J* **22**, 4523-4533
15. Shen, L., Kang, Y. G., Liu, L., and Yu, H. (2011) The J-domain protein J3 mediates the integration of flowering signals in Arabidopsis. *Plant Cell* **23**, 499-514
16. Alonso, J. M., Stepanova, A. N., Leisse, T. J., Kim, C. J., Chen, H., Shinn, P., Stevenson, D. K., Zimmerman, J., Barajas, P., Cheuk, R., Gadrinab, C., Heller, C., Jeske, A., Koesema, E., Meyers, C. C., Parker, H., Prednis, L., Ansari, Y., Choy, N., Deen, H., Geralt, M., Hazari, N., Hom, E., Karnes, M., Mulholland, C., Ndubaku, R., Schmidt, I., Guzman, P., Aguilar-Henonin, L., Schmid, M., Weigel, D., Carter, D. E., Marchand, T., Risseuw, E., Brogden, D., Zeko, A., Crosby, W. L., Berry, C. C., and Ecker, J. R. (2003) Genome-wide insertional mutagenesis of Arabidopsis thaliana. *Science* **301**, 653-657
17. Yang, L., Conway, S. R., and Poethig, R. S. (2011) Vegetative phase change is mediated by a leaf-derived signal that represses the transcription of miR156. *Development* **138**, 245-249
18. Petersen, B. L., Jensen, P. E., Gibson, L. C., Stummann, B. M., Hunter, C. N., and Henningsen, K. W. (1998) Reconstitution of an active magnesium chelatase enzyme complex from the bchI, -D, and -H gene products of the green sulfur bacterium *Chlorobium vibrioforme* expressed in *Escherichia coli*. *J Bact* **180**, 699-704
19. Brodersen, P., Sakvarelidze-Achard, L., Bruun-Rasmussen, M., Dunoyer, P., Yamamoto, Y. Y., Sieburth, L., and Voinnet, O. (2008) Widespread translational inhibition by plant miRNAs and siRNAs. *Science* **320**, 1185-1190
